# Supplementary material for: Differential vulnerability of mineral-associated and particulate soil organic carbon to nitrogen addition in a subtropical forest
Source: Copernicus journal article supplement (doi:10.5194/egusphere-2023-2460), 2023-11-07
Supplement: Supplementary file 1 [file egusphere-2023-2460-supplement.pdf]

1 **Supplementary Material**

2

3 **Table S1** Effects of N addition on physiochemical characteristics of soils.

| Treatments                       | CT          | LN          | HN          | <i>P</i> |
|----------------------------------|-------------|-------------|-------------|----------|
| pH                               | 4.94±0.04 a | 4.58±0.07 b | 4.46±0.12 b | < 0.01   |
| SOC (g kg <sup>-1</sup> )        | 51.0±3.1 b  | 57.5±5.1 a  | 58.0 ±3.2 a | 0.06     |
| TN (g kg <sup>-1</sup> )         | 3.85±0.27 b | 4.44±0.18 a | 4.65±0.26 a | < 0.01   |
| SOC: TN                          | 13.3±0.8 a  | 13.0±1.3 a  | 12.5±0.5 a  | 0.58     |
| Mineral N (mg kg <sup>-1</sup> ) | 56.2±5.6 b  | 70.8±8.4 a  | 76.8±7.2 a  | < 0.01   |
| MBC (mg kg <sup>-1</sup> )       | 1790±67 a   | 1429±146 b  | 1314±75 b   | < 0.01   |

4 CT: control (+0 kg N ha<sup>-1</sup> yr<sup>-1</sup>); LN: low-nitrogen addition (+40 kg N ha<sup>-1</sup> yr<sup>-1</sup>); HN:

5 high-nitrogen addition (+80 kg N ha<sup>-1</sup> yr<sup>-1</sup>); SOC: soil organic carbon; TN: total

6 nitrogen; SOC: TN: ratio of soil organic carbon to total nitrogen; Mineral N: mineral

7 nitrogen; MBC: microbial biomass carbon. *P* represents the main effect of N addition.

8 One-way analysis of variance was performed to determine the effects of N addition on

9 physiochemical characteristics of soils (*P* < 0.05). Different letters in the same row

10 indicate significant differences among the different N addition treatments, as

11 determined using the least significant difference test (*P* < 0.05). Values are presented

12 as mean ± standard deviation (*n* = 4).

13
